# Supplementary material
Source: Springer Nature journal article supplement (https://www.springermedizin.de/resource/supplementary/12883_2013_847_MOESM3_ESM.pdf/9455972)

## Depression (CES-D)

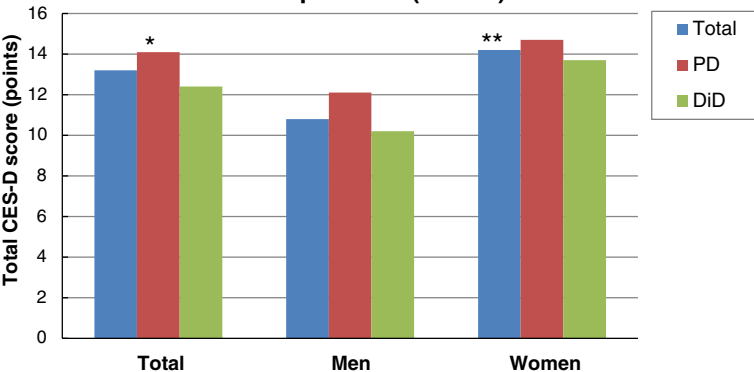

\*  $p = 0.04$  (PD vs DiD total)

\*\*  $p < 0.001$  (men vs. women)

Supplement: MOESM3 [file 9455972]
